# Supplementary material
Source: PubMed Central journal article supplement (PMC2586049)
Supplement: supp_39_6_739__1.pdf [file supp_39_6_739__1.pdf]

Online Data Supplement

## **Endogenous IL-11 Signaling Is Essential in Th2- and IL-13-Induced Inflammation and Mucus Production**

**Chun Geun Lee, M.D., Ph.D., Dominik Hartl, M.D., Ph.D., Hiroshi Matsuura, M. Sci. Felicity M. Dunlop, Ph.D., Pierre D. Scotney, Ph.D., Louis J. Fabri, Ph.D., Andrew D. Nash, Ph.D., Ning-Yuan Chen, Ph.D., Chu-Yan Tang, B. Sci., Qingsheng Chen, M.D., Robert J. Homer, M.D., Ph.D., Manuel Baca, Ph.D., Jack A. Elias, M.D.**

## Online Supplemental Figure E1

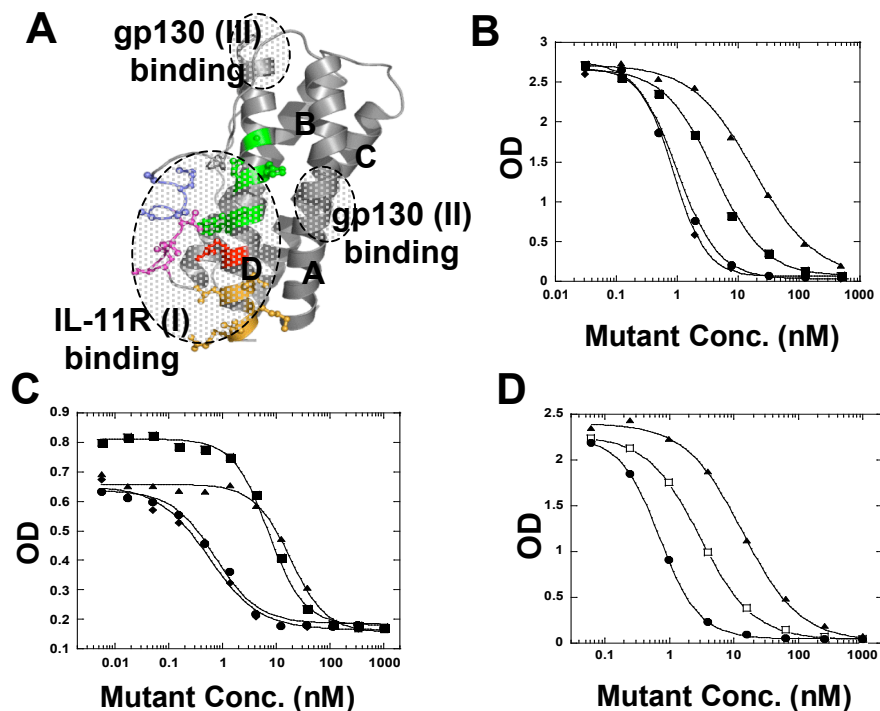

**Figure E1.** **A**, a model of IL-11 generated using the Swiss model server by homology modelling on the structure of IL-6 (A). The IL-11 receptor interfaces are shaded and labelled with the gp130 (site II and site III) and IL-11R $\alpha$  (site I) receptor interfaces. 4 libraries were generated: library 1 (purple) targeting residues 58-62, library 2 (pink) targeting residues 63-67 generated on a clone optimised for residues 58-62, library 3 (green) targeting residues 158, 161, 162, 165, 166 and library 4 (tan) targeting residues 172, 173, 175, 176, 177. Arginine residue R169 (red) was not randomized due to its critical role in IL-11R $\alpha$  binding. **B**, Representative clones from libraries 1, 2 and 3 were expressed as soluble protein and tested in a competition ELISA for comparison with unoptimised mIL-11 with only the W147A change (▲,  $EC_{50}$  = 18 nM), Clone 1.21-W147A was 20-fold improved (●, 58-62 = PAIDY,  $EC_{50}$  = 0.86 nM), Clone 3.5A-W147A (■) was 5-fold improved (155-168 = DGLETTLDF,  $EC_{50}$  = 3.6 nM), and Clone 2.4-W147A (◆) was 20-fold improved to similar level of clone 1.21 (58-67 = PAIDYVLNED,  $EC_{50}$  = 0.84 nM). **C**, Representative clones from libraries 1, 2 and 3 were expressed as soluble protein and tested as antagonists in the IL-11 responsive cell line for comparison with unoptimised mIL-11 with only the W147A change (▲,  $EC_{50}$  = 19 nM), Clone 1.21-W147A was 22-fold improved (●, 58-62 = PAIDY,  $EC_{50}$  = 0.84 nM), Clone 3.5A-W147A (■) was 2-fold improved (155-168 = DGLETTLDF,  $EC_{50}$  = 8.2nM), and Clone 2.4-W147A (◆) was 30-fold improved and similar to clone 1.21 (58-67 = PAIDYVLNED,  $EC_{50}$  = 0.6 nM). **D**, The antagonist activity of PEGylated mIL-11-W147A -Clone 1.21 (□,  $EC_{50}$  = 3.0 nM) was compared with mIL-11-W147A (▲,  $EC_{50}$  = 13 nM) and W147A-Clone 1.21 (●,  $EC_{50}$  = 0.71 nM) in the IL-11 responsive cell line.
